# Supplementary material
Source: ML conference proceedings conference paper supplement (https://openreview.net/forum?id=5yhTMeFlj2)
Supplement: supplementary_material [file updated_references.pdf › waffle_supplementary/updated_references.pdf]

## References

- [1] Brendan McMahan, Eider Moore, Daniel Ramage, Seth Hampson, and Blaise Aguera y Arcas. Communication-efficient learning of deep networks from decentralized data. In *Artificial intelligence and statistics*, pages 1273–1282. PMLR, 2017.
- [2] Keith Bonawitz, Hubert Eichner, Wolfgang Grieskamp, Dzmitry Huba, Alex Ingerman, Vladimir Ivanov, Chloe Kiddon, Jakub Konečný, Stefano Mazzocchi, Brendan McMahan, et al. Towards federated learning at scale: System design. *Proceedings of machine learning and systems*, 1:374–388, 2019.
- [3] Rodolfo Stoffel Antunes, Cristiano André da Costa, Arne Küderle, Imrana Abdullahi Yari, and Björn Eskofier. Federated learning for healthcare: Systematic review and architecture proposal. *ACM Transactions on Intelligent Systems and Technology (TIST)*, 13(4):1–23, 2022.
- [4] Guodong Long, Yue Tan, Jing Jiang, and Chengqi Zhang. Federated learning for open banking. In *Federated learning: privacy and incentive*, pages 240–254. Springer, 2020.
- [5] Tian Li, Anit Kumar Sahu, Manzil Zaheer, Maziar Sanjabi, Ameet Talwalkar, and Virginia Smith. Federated optimization in heterogeneous networks. *Proceedings of Machine learning and systems*, 2:429–450, 2020.
- [6] Matias Mendieta, Taojiannan Yang, Pu Wang, Minwoo Lee, Zhengming Ding, and Chen Chen. Local learning matters: Rethinking data heterogeneity in federated learning. In *Proceedings of the IEEE/CVF Conference on Computer Vision and Pattern Recognition*, pages 8397–8406, 2022.
- [7] Dong Yin, Yudong Chen, Ramchandran Kannan, and Peter Bartlett. Byzantine-robust distributed learning: Towards optimal statistical rates. In *International conference on machine learning*, pages 5650–5659. Pmlr, 2018.
- [8] Xiaoyu Cao, Minghong Fang, Jia Liu, and Neil Zhenqiang Gong. Fltrust: Byzantine-robust federated learning via trust bootstrapping. In *ISOC Network and Distributed System Security Symposium (NDSS)*, 2021.
- [9] Daniel Leiria, Hicham Johra, Justus Anoruo, Imants Praulins, Marco Savino Piscitelli, Alfonso Capozzoli, Anna Marszał-Pomianowska, and Michal Zbigniew Pomianowski. Is it returning too hot? time series segmentation and feature clustering of end-user substation faults in district heating systems. *Applied Energy*, 381:125122, 2025.
- [10] Merim Dzaferagic, Nicola Marchetti, and Irene Macaluso. Fault detection and classification in industrial iot in case of missing sensor data. *IEEE Internet of Things Journal*, 9(11):8892–8900, 2021.
- [11] Shaashwat Agrawal, Sagnik Sarkar, Ons Aouedi, Gokul Yenduri, Kandaraj Piamrat, Mamoun Alazab, Sweta Bhattacharya, Praveen Kumar Reddy Maddikunta, and Thippa Reddy Gadekallu. Federated learning for intrusion detection system: Concepts, challenges and future directions. *Computer Communications*, 195:346–361, 2022.
- [12] Peva Blanchard, El Mahdi El Mhamdi, Rachid Guerraoui, and Julien Stainer. Machine learning with adversaries: Byzantine tolerant gradient descent. *Advances in neural information processing systems*, 30, 2017.
- [13] Stefano Marano, Vincenzo Matta, and Lang Tong. Distributed detection in the presence of byzantine attacks. *IEEE Transactions on Signal Processing*, 57(1):16–29, 2008.
- [14] Clement Fung, Chris JM Yoon, and Ivan Beschastnikh. Mitigating sybils in federated learning poisoning. *arXiv preprint arXiv:1808.04866*, 2018.
- [15] Francesco Colosimo and Floriano De Rango. Median-krum: A joint distance-statistical based byzantine-robust algorithm in federated learning. In *Proceedings of the Int’l ACM Symposium on Mobility Management and Wireless Access*, pages 61–68, 2023.

- [16] Hangyu Zhu, Haoyu Zhang, and Yaochu Jin. From federated learning to federated neural architecture search: a survey. *Complex & Intelligent Systems*, 7(2):639–657, 2021.
- [17] Stéphane Mallat. Group invariant scattering. *Communications on Pure and Applied Mathematics*, 65(10):1331–1398, 2012.
- [18] Zaixi Zhang, Xiaoyu Cao, Jinyuan Jia, and Neil Zhenqiang Gong. Fldetector: Defending federated learning against model poisoning attacks via detecting malicious clients. In *Proceedings of the 28th ACM SIGKDD conference on knowledge discovery and data mining*, pages 2545–2555, 2022.
- [19] Ashish Gupta, Tie Luo, Mao V Ngo, and Sajal K Das. Long-short history of gradients is all you need: Detecting malicious and unreliable clients in federated learning. In *European Symposium on Research in Computer Security*, pages 445–465. Springer, 2022.
- [20] Suyi Li, Yong Cheng, Wei Wang, Yang Liu, and Tianjian Chen. Learning to detect malicious clients for robust federated learning. *arXiv preprint arXiv:2002.00211*, 2020.
- [21] Rachid Guerraoui, Sébastien Rouault, et al. The hidden vulnerability of distributed learning in byzantium. In *International conference on machine learning*, pages 3521–3530. PMLR, 2018.
- [22] Peihua Mai, Ran Yan, and Yan Pang. Rflpa: A robust federated learning framework against poisoning attacks with secure aggregation. *Advances in Neural Information Processing Systems*, 37:104329–104356, 2024.
- [23] Hidde Lycklama, Lukas Burkhalter, Alexander Viand, Nicolas Küchler, and Anwar Hithnawi. Rofl: Robustness of secure federated learning. In *2023 IEEE Symposium on Security and Privacy (SP)*, pages 453–476. IEEE, 2023.
- [24] Zexin Wang, Changhua Pei, Minghua Ma, Xin Wang, Zhihan Li, Dan Pei, Saravan Rajmohan, Dongmei Zhang, Qingwei Lin, Haiming Zhang, et al. Revisiting vae for unsupervised time series anomaly detection: A frequency perspective. In *Proceedings of the ACM Web Conference 2024*, pages 3096–3105, 2024.
- [25] Chi-ho Chan and Grantham KH Pang. Fabric defect detection by fourier analysis. *IEEE transactions on Industry Applications*, 36(5):1267–1276, 2000.
- [26] Ran Tao, Xudong Zhao, Wei Li, Heng-Chao Li, and Qian Du. Hyperspectral anomaly detection by fractional fourier entropy. *IEEE Journal of Selected Topics in Applied Earth Observations and Remote Sensing*, 12(12):4920–4929, 2019.
- [27] Hossein Fereidooni, Alessandro Pegoraro, Phillip Rieger, Alexandra Dmitrienko, and Ahmad-Reza Sadeghi. Freqfed: A frequency analysis-based approach for mitigating poisoning attacks in federated learning. *arXiv preprint arXiv:2312.04432*, 2023.
- [28] Yu Chen and Zihan Tan. Fedssp: Federated graph learning with spectral knowledge and personalized preference. In *Advances in Neural Information Processing Systems 38: Annual Conference on Neural Information Processing Systems 2024, NeurIPS 2024, Vancouver, BC, Canada, December 10 - 15, 2024*, 2024.
- [29] Abhishek B Sharma, Leana Golubchik, and Ramesh Govindan. Sensor faults: Detection methods and prevalence in real-world datasets. *ACM Transactions on Sensor Networks (TOSN)*, 6(3):1–39, 2010.
- [30] Yeping Peng, Zhen Tang, Genping Zhao, Guangzhong Cao, and Chao Wu. Motion blur removal for uav-based wind turbine blade images using synthetic datasets. *Remote Sensing*, 14(1):87, 2021.
- [31] Joan Bruna and Stéphane Mallat. Invariant scattering convolution networks. *IEEE transactions on pattern analysis and machine intelligence*, 35(8):1872–1886, 2013.
- [32] James W Cooley and John W Tukey. An algorithm for the machine calculation of complex fourier series. *Mathematics of computation*, 19(90):297–301, 1965.

- [33] Ronald N Bracewell. The fourier transform. *Scientific American*, 260(6):86–95, 1989.
- [34] Mathieu Andreux, Tomás Angles, Georgios Exarchakis, Roberto Leonarduzzi, Gaspar Rochette, Louis Thiry, John Zarka, Stéphane Mallat, Joakim Andén, Eugene Belilovsky, et al. Kymatio: Scattering transforms in python. *Journal of Machine Learning Research*, 21(60):1–6, 2020.
- [35] Tongzhou Wang, Jun-Yan Zhu, Antonio Torralba, and Alexei A Efros. Dataset distillation. *arXiv preprint arXiv:1811.10959*, 2018.
- [36] Wenxuan Bao, Haohan Wang, Jun Wu, and Jingrui He. Optimizing the collaboration structure in cross-silo federated learning. In *International Conference on Machine Learning*, pages 1718–1736. PMLR, 2023.
- [37] Hervé Abdi and Lynne J Williams. Principal component analysis. *Wiley interdisciplinary reviews: computational statistics*, 2(4):433–459, 2010.
- [38] Usha Ruby, Vamsidhar Yendapalli, et al. Binary cross entropy with deep learning technique for image classification. *Int. J. Adv. Trends Comput. Sci. Eng*, 9(10), 2020.
- [39] Sebastian Caldas, Sai Meher Karthik Duddu, Peter Wu, Tian Li, Jakub Konečný, H Brendan McMahan, Virginia Smith, and Ameet Talwalkar. Leaf: A benchmark for federated settings. *arXiv preprint arXiv:1812.01097*, 2018.
- [40] Han Xiao, Kashif Rasul, and Roland Vollgraf. Fashion-mnist: a novel image dataset for benchmarking machine learning algorithms. *arXiv preprint arXiv:1708.07747*, 2017.
- [41] Alex Krizhevsky, Vinod Nair, and Geoffrey Hinton. Cifar-10 (canadian institute for advanced research).
- [42] Yudong Chen, Lili Su, and Jiaming Xu. Distributed statistical machine learning in adversarial settings: Byzantine gradient descent. *Proceedings of the ACM on Measurement and Analysis of Computing Systems*, 1(2):1–25, 2017.
- [43] Jake Lever. Classification evaluation: It is important to understand both what a classification metric expresses and what it hides. *Nature methods*, 13(8):603–605, 2016.
- [44] Yann LeCun, Larry Jackel, Leon Bottou, A Brunot, Corinna Cortes, John Denker, Harris Drucker, Isabelle Guyon, Urs Muller, Eduard Sackinger, et al. Comparison of learning algorithms for handwritten digit recognition. In *International conference on artificial neural networks*, volume 60, pages 53–60. Perth, Australia, 1995.
- [45] Diederik P Kingma. Adam: A method for stochastic optimization. *arXiv preprint arXiv:1412.6980*, 2014.
- [46] Mathieu Andreux, Tomás Angles, Georgios Exarchakis, Roberto Leonarduzzi, Gaspar Rochette, Louis Thiry, John Zarka, Stéphane Mallat, Joakim Andén, Eugene Belilovsky, Joan Bruna, Vincent Lostanlen, Muawiz Chaudhary, Matthew J. Hirn, Edouard Oyallon, Sixin Zhang, Carmine Cella, and Michael Eickenberg. Kymatio: Scattering transforms in python. *Journal of Machine Learning Research*, 21(60):1–6, 2020.
- [47] Mohammad Hossin and Md Nasir Sulaiman. A review on evaluation metrics for data classification evaluations. *International journal of data mining & knowledge management process*, 5(2):1, 2015.
- [48] Keith Bonawitz, Vladimir Ivanov, Ben Kreuter, Antonio Marcedone, H Brendan McMahan, Sarvar Patel, Daniel Ramage, Aaron Segal, and Karn Seth. Practical secure aggregation for privacy-preserving machine learning. In *proceedings of the 2017 ACM SIGSAC Conference on Computer and Communications Security*, pages 1175–1191, 2017.
